# Supplementary material
Source: PubMed Central journal article supplement (PMC9122646)
Supplement: gbac031_suppl_supplementary_appendix.pdf [file gbac031_suppl_supplementary_appendix.pdf]

## APPENDIX

**Table A1:** First Stage Results – Cluster robust standard errors on care recipient level

|                                                        | (1)                                                |         | (2)                                          |         |
|--------------------------------------------------------|----------------------------------------------------|---------|----------------------------------------------|---------|
|                                                        | Intensive caregiving<br>(min. 80 hours a<br>month) |         | Work for pay<br>in the last week or<br>month |         |
| Number of children                                     | -0.012***                                          | (0.004) | 0.003                                        | (0.005) |
| Reached early retirement age ( $\geq 62$ years<br>old) | -0.018                                             | (0.030) | -0.141***                                    | (0.032) |
| Widowed (SP)                                           | 0.092***                                           | (0.019) | -0.081***                                    | (0.022) |
| Married                                                | -0.131***                                          | (0.018) | 0.057**                                      | (0.020) |
| Black                                                  | 0.154***                                           | (0.024) | -0.051*                                      | (0.026) |
| Other                                                  | 0.079                                              | (0.045) | -0.024                                       | (0.057) |
| Hispanic                                               | 0.190***                                           | (0.038) | -0.053                                       | (0.036) |
| Age in years                                           | -0.015                                             | (0.009) | 0.016*                                       | (0.008) |
| Age in years squared/100                               | 0.012                                              | (0.008) | -0.024**                                     | (0.007) |
| Male                                                   | -0.098***                                          | (0.018) | 0.032                                        | (0.021) |
| Numb. of self-care or mob. lim. (SP)                   | 0.028***                                           | (0.003) | -0.001                                       | (0.003) |
| Proxy answ. NHATS questions (SP)                       | 0.034                                              | (0.033) | -0.014                                       | (0.032) |
| Heart attack (SP)                                      | 0.021                                              | (0.029) | -0.014                                       | (0.029) |
| Heart disease (SP)                                     | -0.011                                             | (0.019) | -0.003                                       | (0.022) |
| High blood pressure (SP)                               | -0.001                                             | (0.022) | -0.025                                       | (0.024) |
| Arthritis (SP)                                         | -0.012                                             | (0.021) | 0.004                                        | (0.023) |
| Osteoporosis (SP)                                      | -0.005                                             | (0.018) | -0.021                                       | (0.021) |
| Diabetes (SP)                                          | -0.003                                             | (0.020) | -0.006                                       | (0.021) |

|                                           |           |         |         |         |
|-------------------------------------------|-----------|---------|---------|---------|
| Lung disease (SP)                         | 0.046*    | (0.021) | -0.055* | (0.023) |
| Stroke (SP)                               | 0.032     | (0.026) | -0.058* | (0.027) |
| Dementia (SP)                             | 0.035     | (0.026) | -0.023  | (0.028) |
| Cancer (SP)                               | 0.023     | (0.023) | 0.021   | (0.027) |
| Lives in an assisted living facility (SP) | -0.198*** | (0.019) | 0.058*  | (0.029) |
| NSOC Round II                             | -0.014    | (0.021) | -0.011  | (0.022) |
| NSOC Round III                            | -0.006    | (0.021) | 0.006   | (0.023) |
| Constant                                  | 0.651**   | (0.222) | 0.578** | (0.209) |
| <hr/>                                     |           |         |         |         |
| F-Statistic                               | 11.50     |         | 19.98   |         |
| Number of observations                    | 3,039     |         | 3,039   |         |

Note: SP represents NHATS survey person and denotes care recipient information. All other variables are on caregiver level. Standard Errors in parentheses. Cluster robust standard errors on care recipient level (Number of clusters: 1,809). We estimate regressions for individuals who provide information on all outcomes to better compare results. F-Statistic is the Sanderson-Windmeijer first-stage F statistic of weak identification of individual endogenous regressor (Sanderson & Windmeijer, 2016). \*  $p < 0.05$ , \*\*  $p < 0.01$ , \*\*\*  $p < 0.001$

Table A2. Main results – Cluster robust standard errors on care recipient level

|                                      | (1)      |         | (2)       |         | (3)    |         | (4)     |         | (5)     |         | (6)     |         | (7)          |         |
|--------------------------------------|----------|---------|-----------|---------|--------|---------|---------|---------|---------|---------|---------|---------|--------------|---------|
|                                      | PHQ4     |         | GAD2      |         | PHQ2   |         | purpose |         | growth  |         | closer  |         | satisfaction |         |
| Intensive caregiving                 | 4.632*   | (2.237) | 3.211*    | (1.350) | 1.420  | (1.075) | -0.037  | (0.142) | 0.355   | (0.260) | -0.528* | (0.252) | -0.164*      | (0.083) |
| Work for pay                         | 0.866    | (1.355) | 0.275     | (0.849) | 0.591  | (0.649) | 0.187   | (0.099) | 0.039   | (0.169) | -0.040  | (0.185) | -0.062       | (0.067) |
| Widowed (SP)                         | -0.141   | (0.264) | -0.194    | (0.163) | 0.053  | (0.125) | -0.003  | (0.016) | -0.020  | (0.032) | 0.028   | (0.030) | 0.010        | (0.010) |
| Married                              | -0.103   | (0.326) | 0.175     | (0.197) | -0.278 | (0.157) | 0.008   | (0.021) | 0.097*  | (0.039) | -0.081* | (0.037) | -0.019       | (0.011) |
| Black                                | -1.005** | (0.363) | -0.785*** | (0.225) | -0.219 | (0.171) | 0.019   | (0.025) | -0.021  | (0.042) | 0.132** | (0.043) | 0.036**      | (0.013) |
| Other                                | -0.597   | (0.404) | -0.380    | (0.243) | -0.217 | (0.190) | 0.006   | (0.025) | -0.051  | (0.048) | 0.057   | (0.040) | 0.012        | (0.017) |
| Hispanic                             | -1.083*  | (0.469) | -0.725*   | (0.295) | -0.358 | (0.221) | -0.022  | (0.034) | -0.107  | (0.058) | 0.135*  | (0.055) | 0.039*       | (0.018) |
| Age in years                         | 0.098    | (0.079) | 0.058     | (0.047) | 0.040  | (0.039) | -0.010* | (0.004) | -0.002  | (0.009) | 0.001   | (0.010) | -0.001       | (0.003) |
| Age in years squared/100             | -0.089   | (0.083) | -0.056    | (0.050) | -0.032 | (0.040) | 0.012*  | (0.005) | 0.003   | (0.009) | -0.002  | (0.011) | -0.000       | (0.004) |
| Male                                 | 0.043    | (0.246) | -0.009    | (0.151) | 0.052  | (0.119) | -0.012  | (0.017) | 0.034   | (0.029) | -0.064* | (0.030) | -0.025*      | (0.011) |
| Numb. of self-care or mob. lim. (SP) | -0.051   | (0.063) | -0.054    | (0.038) | 0.003  | (0.030) | 0.000   | (0.004) | -0.015* | (0.008) | 0.015*  | (0.007) | 0.005        | (0.002) |
| Proxy answ. NHATS questions (SP)     | -0.451   | (0.244) | -0.256    | (0.154) | -0.195 | (0.112) | -0.007  | (0.016) | 0.031   | (0.030) | 0.031   | (0.031) | 0.013        | (0.011) |
| Heart attack (SP)                    | -0.096   | (0.198) | -0.061    | (0.130) | -0.035 | (0.089) | 0.022*  | (0.011) | -0.061* | (0.027) | 0.046*  | (0.024) | 0.008        | (0.007) |
| Heart disease (SP)                   | 0.308*   | (0.134) | 0.173*    | (0.086) | 0.134* | (0.063) | 0.011   | (0.009) | 0.023   | (0.017) | -0.024  | (0.017) | 0.003        | (0.005) |
| High blood pressure                  | 0.055    | (0.159) | 0.044     | (0.099) | 0.011  | (0.074) | -0.000  | (0.010) | -0.010  | (0.019) | 0.002   | (0.021) | -0.008       | (0.006) |

|                                              |        |         |        |         |        |         |          |         |         |         |          |         |          |         |
|----------------------------------------------|--------|---------|--------|---------|--------|---------|----------|---------|---------|---------|----------|---------|----------|---------|
| (SP)                                         |        |         |        |         |        |         |          |         |         |         |          |         |          |         |
| Arthritis (SP)                               | 0.096  | (0.146) | 0.024  | (0.088) | 0.073  | (0.073) | 0.001    | (0.009) | -0.005  | (0.018) | -0.008   | (0.018) | -0.015** | (0.006) |
| Osteoporosis (SP)                            | -0.117 | (0.126) | -0.003 | (0.081) | -0.113 | (0.060) | -0.000   | (0.009) | 0.020   | (0.016) | 0.011    | (0.017) | 0.005    | (0.006) |
| Diabetes (SP)                                | 0.076  | (0.138) | 0.011  | (0.086) | 0.066  | (0.066) | -0.000   | (0.009) | 0.005   | (0.017) | -0.011   | (0.016) | -0.007   | (0.006) |
| Lung disease (SP)                            | -0.018 | (0.193) | -0.055 | (0.121) | 0.037  | (0.089) | 0.013    | (0.012) | -0.053* | (0.024) | 0.026    | (0.023) | 0.013    | (0.008) |
| Stroke (SP)                                  | 0.127  | (0.215) | 0.074  | (0.135) | 0.053  | (0.100) | -0.014   | (0.015) | -0.011  | (0.027) | 0.006    | (0.026) | 0.009    | (0.008) |
| Dementia (SP)                                | 0.111  | (0.205) | 0.033  | (0.127) | 0.078  | (0.098) | 0.017    | (0.012) | -0.044  | (0.026) | -0.011   | (0.026) | 0.002    | (0.011) |
| Cancer (SP)                                  | 0.052  | (0.179) | -0.002 | (0.111) | 0.054  | (0.088) | -0.012   | (0.012) | -0.012  | (0.022) | -0.004   | (0.023) | -0.000   | (0.008) |
| Lives in an assisted<br>living facility (SP) | 0.698  | (0.482) | 0.542  | (0.293) | 0.156  | (0.231) | -0.006   | (0.029) | 0.116*  | (0.055) | -0.113*  | (0.055) | -0.024   | (0.018) |
| NSOC Round II                                | -0.127 | (0.142) | -0.048 | (0.092) | -0.079 | (0.067) | 0.004    | (0.009) | 0.008   | (0.018) | 0.002    | (0.017) | -0.007   | (0.006) |
| NSOC Round III                               | -0.051 | (0.147) | 0.044  | (0.093) | -0.094 | (0.070) | -0.009   | (0.010) | 0.012   | (0.019) | 0.010    | (0.018) | -0.012   | (0.006) |
| Constant                                     | -1.914 | (2.154) | -1.047 | (1.293) | -0.867 | (1.057) | 1.044*** | (0.119) | 0.812** | (0.251) | 1.039*** | (0.238) | 1.134*** | (0.094) |
| Outcome is binary                            | no     |         | no     |         | no     |         | yes      |         | yes     |         | yes      |         | yes      |         |
| Number of observations                       | 3,039  |         | 3,039  |         | 3,039  |         | 3,039    |         | 3,039   |         | 3,039    |         | 3,039    |         |

Note: SP represents NHATS survey person and denotes care recipient information. All other variables are on caregiver level. Standard Errors in parentheses. Cluster robust standard errors on care recipient level (Number of clusters: 1,809). We estimate regressions for individuals who provide information on all outcomes to better compare results. Intensive caregiving denotes helping minimum of 80 hours a month. Work for pay denotes working in the last week or month. \*  $p < 0.05$ , \*\*  $p < 0.01$ , \*\*\*  $p < 0.001$

Table A3. Main results – Unadjusted associations

|                        | (1)              | (2)              | (3)              | (4)              | (5)              | (6)              | (7)              |
|------------------------|------------------|------------------|------------------|------------------|------------------|------------------|------------------|
|                        | PHQ4             | GAD2             | PHQ2             | purpose          | growth           | closer           | satisfaction     |
| Intensive caregiving   | 2.629*** (0.092) | 1.305*** (0.052) | 1.324*** (0.048) | 0.952*** (0.026) | 0.818*** (0.026) | 0.929*** (0.026) | 0.997*** (0.026) |
| Work for pay           | 1.841*** (0.072) | 0.992*** (0.040) | 0.849*** (0.038) | 0.975*** (0.016) | 0.889*** (0.016) | 0.902*** (0.017) | 0.988*** (0.017) |
| Number of observations | 3,039            | 3,039            | 3,039            | 3,039            | 3,039            | 3,039            | 3,039            |

Standard Errors in parentheses. Unadjusted associations (Separate estimations). We estimate regressions for individuals who provide information on all outcomes to better compare results. Intensive caregiving denotes helping minimum of 80 hours a month. Work for pay denotes working in the last week or month. \* p < 0.05, \*\* p < 0.01, \*\*\* p < 0.001

Table A4. Main results – OLS estimations

|                                         | (1)                  | (2)                  | (3)                  | (4)                 | (5)                 | (6)                 | (7)                |
|-----------------------------------------|----------------------|----------------------|----------------------|---------------------|---------------------|---------------------|--------------------|
|                                         | PHQ4                 | GAD2                 | PHQ2                 | purpose             | growth              | closer              | satisfaction       |
| Intensive caregiving                    | 0.544***<br>(0.115)  | 0.239***<br>(0.065)  | 0.306***<br>(0.064)  | -0.008<br>(0.008)   | -0.037*<br>(0.016)  | 0.015<br>(0.012)    | 0.009**<br>(0.004) |
| Work for pay                            | -0.589***<br>(0.107) | -0.250***<br>(0.060) | -0.338***<br>(0.057) | 0.020**<br>(0.007)  | 0.060***<br>(0.014) | -0.012<br>(0.011)   | 0.004<br>(0.004)   |
| Widowed (SP)                            | 0.090<br>(0.106)     | 0.019<br>(0.061)     | 0.071<br>(0.057)     | -0.020**<br>(0.008) | 0.016<br>(0.015)    | -0.016<br>(0.012)   | 0.001<br>(0.004)   |
| Married                                 | -0.556***<br>(0.103) | -0.184**<br>(0.059)  | -0.372***<br>(0.056) | 0.021*<br>(0.008)   | 0.044**<br>(0.014)  | -0.011<br>(0.012)   | 0.000<br>(0.004)   |
| Black                                   | -0.485***<br>(0.120) | -0.383***<br>(0.067) | -0.102<br>(0.067)    | 0.007<br>(0.009)    | 0.037*<br>(0.016)   | 0.056***<br>(0.014) | 0.014**<br>(0.005) |
| Other                                   | -0.338<br>(0.273)    | -0.179<br>(0.158)    | -0.160<br>(0.141)    | -0.001<br>(0.021)   | -0.022<br>(0.040)   | 0.019<br>(0.027)    | 0.002<br>(0.013)   |
| Hispanic                                | -0.445*<br>(0.203)   | -0.234<br>(0.127)    | -0.212*<br>(0.108)   | -0.036<br>(0.021)   | -0.037<br>(0.031)   | 0.042*<br>(0.021)   | 0.012<br>(0.007)   |
| Age in years                            | 0.084<br>(0.047)     | 0.031<br>(0.026)     | 0.053*<br>(0.025)    | -0.004<br>(0.002)   | -0.009<br>(0.006)   | 0.008<br>(0.005)    | -0.001<br>(0.002)  |
| Age in years squared/100                | -0.103*<br>(0.042)   | -0.044<br>(0.023)    | -0.059**<br>(0.023)  | 0.004<br>(0.002)    | 0.008<br>(0.005)    | -0.007<br>(0.005)   | 0.001<br>(0.002)   |
| Male                                    | -0.299**<br>(0.100)  | -0.274***<br>(0.058) | -0.025<br>(0.054)    | -0.004<br>(0.008)   | -0.003<br>(0.014)   | -0.014<br>(0.013)   | -0.011*<br>(0.005) |
| Numb. of self-care or<br>mob. lim. (SP) | 0.057**<br>(0.018)   | 0.025*<br>(0.010)    | 0.032***<br>(0.010)  | -0.001<br>(0.001)   | -0.005<br>(0.003)   | 0.000<br>(0.002)    | 0.000<br>(0.001)   |
| Proxy ans. NHATS<br>questions (SP)      | -0.320<br>(0.169)    | -0.155<br>(0.099)    | -0.164<br>(0.090)    | -0.010<br>(0.013)   | 0.045<br>(0.024)    | 0.012<br>(0.022)    | 0.007<br>(0.008)   |
| Heart attack (SP)                       | -0.030<br>(0.146)    | -0.006<br>(0.087)    | -0.024<br>(0.077)    | 0.019*<br>(0.009)   | -0.053*<br>(0.023)  | 0.035*<br>(0.016)   | 0.006<br>(0.004)   |
| Heart disease (SP)                      | 0.258*<br>(0.106)    | 0.139*<br>(0.062)    | 0.119*<br>(0.057)    | 0.011<br>(0.007)    | 0.018<br>(0.015)    | -0.018<br>(0.013)   | 0.005<br>(0.004)   |
| High blood pressure<br>(SP)             | 0.005<br>(0.121)     | 0.022<br>(0.069)     | -0.017<br>(0.065)    | -0.005<br>(0.009)   | -0.010<br>(0.017)   | 0.004<br>(0.015)    | -0.006<br>(0.004)  |

|                                           |        |         |        |         |         |         |          |         |          |         |          |         |          |         |
|-------------------------------------------|--------|---------|--------|---------|---------|---------|----------|---------|----------|---------|----------|---------|----------|---------|
| Arthritis (SP)                            | 0.053  | (0.112) | -0.010 | (0.063) | 0.063   | (0.062) | 0.002    | (0.008) | -0.010   | (0.016) | -0.002   | (0.014) | -0.013** | (0.004) |
| Osteoporosis (SP)                         | -0.162 | (0.100) | -0.025 | (0.058) | -0.137* | (0.054) | -0.004   | (0.008) | 0.019    | (0.014) | 0.013    | (0.012) | 0.007    | (0.005) |
| Diabetes (SP)                             | 0.051  | (0.107) | -0.006 | (0.060) | 0.056   | (0.060) | -0.001   | (0.008) | 0.003    | (0.015) | -0.008   | (0.012) | -0.006   | (0.005) |
| Lung disease (SP)                         | 0.087  | (0.118) | 0.051  | (0.067) | 0.037   | (0.063) | 0.002    | (0.008) | -0.034*  | (0.016) | 0.003    | (0.013) | 0.009*   | (0.004) |
| Stroke (SP)                               | 0.187  | (0.145) | 0.149  | (0.086) | 0.038   | (0.076) | -0.025*  | (0.012) | 0.004    | (0.020) | -0.011   | (0.016) | 0.007*   | (0.003) |
| Dementia (SP)                             | 0.230  | (0.142) | 0.133  | (0.085) | 0.097   | (0.075) | 0.011    | (0.010) | -0.029   | (0.021) | -0.031   | (0.018) | -0.003   | (0.008) |
| Cancer (SP)                               | 0.177  | (0.132) | 0.079  | (0.076) | 0.099   | (0.073) | -0.009   | (0.010) | -0.003   | (0.018) | -0.018   | (0.017) | -0.006   | (0.006) |
| Lives in an assisted living facility (SP) | -0.026 | (0.139) | -0.015 | (0.080) | -0.010  | (0.073) | 0.010    | (0.009) | 0.037*   | (0.017) | -0.008   | (0.019) | 0.006    | (0.007) |
| NSOC Round II                             | -0.200 | (0.109) | -0.096 | (0.063) | -0.105  | (0.060) | 0.002    | (0.008) | 0.003    | (0.016) | 0.010    | (0.013) | -0.004   | (0.004) |
| NSOC Round III                            | -0.062 | (0.117) | 0.031  | (0.067) | -0.093  | (0.064) | -0.008   | (0.009) | 0.009    | (0.017) | 0.013    | (0.014) | -0.011*  | (0.005) |
| Constant                                  | 1.041  | (1.310) | 0.940  | (0.741) | 0.100   | (0.697) | 1.077*** | (0.069) | 1.047*** | (0.156) | 0.697*** | (0.133) | 1.008*** | (0.053) |
| Number of observations                    | 3,039  |         | 3,039  |         | 3,039   |         | 3,039    |         | 3,039    |         | 3,039    |         | 3,039    |         |

Note: SP represents NHATS survey person and denotes care recipient information. All other variables are on caregiver level. Standard Errors in parentheses. Cluster robust standard errors on caregiver individual level. We estimate regressions for individuals who provide information on all outcomes to better compare results. Intensive caregiving denotes helping minimum of 80 hours a month. Work for pay denotes working in the last week or month. \*  $p < 0.05$ , \*\*  $p < 0.01$ , \*\*\*  $p < 0.001$

Table A5: First Stage Results – Estimations including sampling strata to consider geographic clustering

|                                                        | (1)                                                |         | (2)                                          |         |
|--------------------------------------------------------|----------------------------------------------------|---------|----------------------------------------------|---------|
|                                                        | Intensive caregiving<br>(min. 80 hours a<br>month) |         | Work for pay<br>in the last week or<br>month |         |
| Number of children                                     | -0.012**                                           | (0.004) | 0.003                                        | (0.004) |
| Reached early retirement age ( $\geq 62$ years<br>old) | -0.018                                             | (0.029) | -0.141***                                    | (0.032) |
| Widowed (SP)                                           | 0.092***                                           | (0.018) | -0.081***                                    | (0.021) |
| Married                                                | -0.130***                                          | (0.018) | 0.056**                                      | (0.020) |
| Black                                                  | 0.145***                                           | (0.023) | -0.041                                       | (0.025) |
| Other                                                  | 0.071                                              | (0.047) | -0.014                                       | (0.053) |
| Hispanic                                               | 0.179***                                           | (0.038) | -0.040                                       | (0.038) |
| Age in years                                           | -0.015                                             | (0.008) | 0.015                                        | (0.008) |
| Age in years squared/100                               | 0.012                                              | (0.008) | -0.024**                                     | (0.008) |
| Male                                                   | -0.098***                                          | (0.018) | 0.033                                        | (0.020) |
| Numb. of self-care or mob. lim. (SP)                   | 0.027***                                           | (0.003) | -0.001                                       | (0.003) |
| Proxy answ. NHATS questions (SP)                       | 0.036                                              | (0.031) | -0.015                                       | (0.032) |
| Heart attack (SP)                                      | 0.022                                              | (0.028) | -0.015                                       | (0.029) |
| Heart disease (SP)                                     | -0.011                                             | (0.019) | -0.003                                       | (0.021) |
| High blood pressure (SP)                               | -0.001                                             | (0.021) | -0.024                                       | (0.024) |
| Arthritis (SP)                                         | -0.012                                             | (0.020) | 0.004                                        | (0.023) |
| Osteoporosis (SP)                                      | -0.005                                             | (0.018) | -0.020                                       | (0.020) |
| Diabetes (SP)                                          | -0.003                                             | (0.019) | -0.005                                       | (0.021) |



|                                           |           |         |         |         |
|-------------------------------------------|-----------|---------|---------|---------|
| Lung disease (SP)                         | 0.045*    | (0.021) | -0.054* | (0.023) |
| Stroke (SP)                               | 0.031     | (0.026) | -0.057* | (0.026) |
| Dementia (SP)                             | 0.034     | (0.025) | -0.022  | (0.026) |
| Cancer (SP)                               | 0.021     | (0.023) | 0.024   | (0.026) |
| Lives in an assisted living facility (SP) | -0.196*** | (0.019) | 0.056*  | (0.029) |
| NSOC Round II                             | -0.015    | (0.020) | -0.011  | (0.021) |
| NSOC Round III                            | -0.006    | (0.021) | 0.007   | (0.022) |
| Sampling strata                           | 0.001     | (0.001) | -0.001  | (0.001) |
| Constant                                  | 0.630**   | (0.221) | 0.603** | (0.213) |
| F-Statistic                               | 9.65      |         | 19.68   |         |
| Number of observations                    | 3,039     |         | 3,039   |         |

Note: SP represents NHATS survey person and denotes care recipient information. All other variables are on caregiver level. Standard Errors in parentheses. Cluster robust standard errors on caregiver level (Number of clusters: 2,440). Sampling strata variable indicates the stratum from which the Primary Sampling Units were drawn and addresses geographic clustering in the regression to account for the survey design. We estimate regressions for individuals who provide information on all outcomes to better compare results. F-Statistic is the Sanderson-Windmeijer first-stage F statistic of weak identification of individual endogenous regressor (Sanderson & Windmeijer, 2016). \*  $p < 0.05$ , \*\*  $p < 0.01$ , \*\*\*  $p < 0.001$

Table A6. Main results – Estimations including sampling strata to consider geographic clustering

|                                      | (1)      |         | (2)       |         | (3)    |         | (4)     |         | (5)     |         | (6)     |         | (7)          |         |
|--------------------------------------|----------|---------|-----------|---------|--------|---------|---------|---------|---------|---------|---------|---------|--------------|---------|
|                                      | PHQ4     |         | GAD2      |         | PHQ2   |         | purpose |         | growth  |         | closer  |         | satisfaction |         |
| Intensive caregiving                 | 4.838*   | (2.330) | 3.385*    | (1.445) | 1.453  | (1.097) | -0.049  | (0.144) | 0.338   | (0.274) | -0.532* | (0.267) | -0.169*      | (0.085) |
| Work for pay                         | 0.850    | (1.384) | 0.261     | (0.884) | 0.588  | (0.647) | 0.188   | (0.098) | 0.041   | (0.170) | -0.039  | (0.183) | -0.062       | (0.067) |
| Widowed (SP)                         | -0.161   | (0.273) | -0.211    | (0.172) | 0.050  | (0.128) | -0.002  | (0.016) | -0.018  | (0.032) | 0.029   | (0.031) | 0.011        | (0.010) |
| Married                              | -0.079   | (0.339) | 0.195     | (0.211) | -0.274 | (0.160) | 0.006   | (0.021) | 0.095*  | (0.041) | -0.081* | (0.039) | -0.019       | (0.012) |
| Black                                | -0.993** | (0.357) | -0.775*** | (0.225) | -0.217 | (0.167) | 0.018   | (0.024) | -0.022  | (0.041) | 0.132** | (0.042) | 0.036**      | (0.013) |
| Other                                | -0.569   | (0.376) | -0.356    | (0.230) | -0.213 | (0.175) | 0.004   | (0.025) | -0.053  | (0.046) | 0.056   | (0.039) | 0.012        | (0.017) |
| Hispanic                             | -1.067*  | (0.468) | -0.711*   | (0.299) | -0.356 | (0.216) | -0.023  | (0.034) | -0.108  | (0.056) | 0.135*  | (0.054) | 0.039*       | (0.017) |
| Age in years                         | 0.101    | (0.079) | 0.061     | (0.049) | 0.041  | (0.039) | -0.010* | (0.005) | -0.002  | (0.009) | 0.000   | (0.010) | -0.001       | (0.003) |
| Age in years squared/100             | -0.091   | (0.084) | -0.058    | (0.052) | -0.033 | (0.040) | 0.012*  | (0.005) | 0.003   | (0.010) | -0.001  | (0.011) | -0.000       | (0.004) |
| Male                                 | 0.067    | (0.258) | 0.012     | (0.162) | 0.055  | (0.122) | -0.013  | (0.017) | 0.032   | (0.031) | -0.065* | (0.032) | -0.026*      | (0.011) |
| Numb. of self-care or mob. lim. (SP) | -0.055   | (0.065) | -0.058    | (0.041) | 0.002  | (0.030) | 0.001   | (0.004) | -0.015  | (0.008) | 0.015   | (0.008) | 0.005*       | (0.002) |
| Proxy answ. NHATS questions (SP)     | -0.465   | (0.240) | -0.268    | (0.152) | -0.197 | (0.111) | -0.006  | (0.016) | 0.032   | (0.029) | 0.031   | (0.029) | 0.013        | (0.010) |
| Heart attack (SP)                    | -0.103   | (0.199) | -0.067    | (0.128) | -0.036 | (0.092) | 0.022*  | (0.011) | -0.060* | (0.027) | 0.046*  | (0.022) | 0.009        | (0.007) |
| Heart disease (SP)                   | 0.310*   | (0.133) | 0.175*    | (0.085) | 0.135* | (0.063) | 0.011   | (0.008) | 0.022   | (0.016) | -0.024  | (0.017) | 0.003        | (0.005) |
| High blood pressure (SP)             | 0.061    | (0.154) | 0.049     | (0.097) | 0.012  | (0.072) | -0.001  | (0.010) | -0.010  | (0.019) | 0.002   | (0.020) | -0.008       | (0.006) |
| Arthritis (SP)                       | 0.099    | (0.142) | 0.026     | (0.087) | 0.073  | (0.070) | 0.001   | (0.009) | -0.005  | (0.018) | -0.008  | (0.018) | -0.015**     | (0.006) |
| Osteoporosis (SP)                    | -0.115   | (0.125) | -0.002    | (0.080) | -0.113 | (0.060) | -0.000  | (0.009) | 0.020   | (0.016) | 0.011   | (0.016) | 0.005        | (0.006) |
| Diabetes (SP)                        | 0.080    | (0.133) | 0.014     | (0.084) | 0.066  | (0.064) | -0.000  | (0.009) | 0.004   | (0.016) | -0.011  | (0.016) | -0.007       | (0.006) |

|                                           |        |         |        |         |        |         |          |         |         |         |          |         |          |         |
|-------------------------------------------|--------|---------|--------|---------|--------|---------|----------|---------|---------|---------|----------|---------|----------|---------|
| Lung disease (SP)                         | -0.025 | (0.193) | -0.060 | (0.122) | 0.036  | (0.089) | 0.013    | (0.012) | -0.053* | (0.024) | 0.026    | (0.023) | 0.013    | (0.008) |
| Stroke (SP)                               | 0.124  | (0.208) | 0.071  | (0.133) | 0.053  | (0.097) | -0.014   | (0.014) | -0.011  | (0.027) | 0.007    | (0.026) | 0.009    | (0.008) |
| Dementia (SP)                             | 0.108  | (0.201) | 0.030  | (0.127) | 0.078  | (0.095) | 0.017    | (0.012) | -0.044  | (0.025) | -0.011   | (0.025) | 0.002    | (0.010) |
| Cancer (SP)                               | 0.060  | (0.174) | 0.005  | (0.108) | 0.056  | (0.085) | -0.012   | (0.011) | -0.012  | (0.021) | -0.004   | (0.022) | -0.001   | (0.008) |
| Lives in an assisted living facility (SP) | 0.732  | (0.496) | 0.571  | (0.309) | 0.161  | (0.233) | -0.008   | (0.029) | 0.113*  | (0.057) | -0.114*  | (0.057) | -0.025   | (0.018) |
| NSOC Round II                             | -0.122 | (0.142) | -0.044 | (0.092) | -0.078 | (0.067) | 0.004    | (0.009) | 0.008   | (0.019) | 0.002    | (0.017) | -0.007   | (0.006) |
| NSOC Round III                            | -0.049 | (0.147) | 0.045  | (0.093) | -0.094 | (0.070) | -0.009   | (0.010) | 0.012   | (0.019) | 0.010    | (0.018) | -0.012   | (0.006) |
| Sampling strata                           | -0.006 | (0.006) | -0.005 | (0.004) | -0.001 | (0.003) | 0.000    | (0.000) | 0.000   | (0.001) | 0.000    | (0.001) | 0.000    | (0.000) |
| Constant                                  | -1.930 | (2.101) | -1.061 | (1.292) | -0.869 | (1.025) | 1.045*** | (0.125) | 0.813** | (0.249) | 1.039*** | (0.228) | 1.135*** | (0.087) |
| Outcome is binary                         | no     |         | no     |         | no     |         | yes      |         | yes     |         | yes      |         | yes      |         |
| Number of observations                    | 3,039  |         | 3,039  |         | 3,039  |         | 3,039    |         | 3,039   |         | 3,039    |         | 3,039    |         |

Note: SP represents NHATS survey person and denotes care recipient information. All other variables are on caregiver level. Standard Errors in parentheses. Cluster robust standard errors on caregiver level (Number of clusters: 2,440). Sampling strata variable indicates the stratum from which the Primary Sampling Units were drawn and addresses geographic clustering in the regression to account for the survey design. We estimate regressions for individuals who provide information on all outcomes to better compare results. Intensive caregiving denotes helping minimum of 80 hours a month. Work for pay denotes working in the last week or month. \*  $p < 0.05$ , \*\*  $p < 0.01$ , \*\*\*  $p < 0.001$

Table A7: First Stage Results using NSOC cross-sectional weights

|                                                     | (1)                                          |       | (2)                                    |       |
|-----------------------------------------------------|----------------------------------------------|-------|----------------------------------------|-------|
|                                                     | Intensive caregiving (min. 80 hours a month) |       | Work for pay in the last week or month |       |
| Number of children                                  | -0,009*                                      | 0,004 | 0,012*                                 | 0,005 |
| Reached early retirement age ( $\geq 62$ years old) | 0,011                                        | 0,032 | -0,159***                              | 0,041 |
| Widowed (SP)                                        | 0,076***                                     | 0,021 | -0,097***                              | 0,026 |
| Married                                             | -0,144***                                    | 0,021 | 0,088***                               | 0,024 |
| Black                                               | 0,176***                                     | 0,028 | -0,039                                 | 0,031 |
| Other                                               | 0,013                                        | 0,045 | -0,009                                 | 0,064 |
| Hispanic                                            | 0,182***                                     | 0,045 | -0,010                                 | 0,040 |
| Age in years                                        | -0,005                                       | 0,010 | 0,017                                  | 0,010 |
| Age in years squared/100                            | 0,003                                        | 0,010 | -0,025*                                | 0,010 |
| Male                                                | -0,078***                                    | 0,021 | 0,040                                  | 0,025 |
| Numb. of self-care or mob. lim. (SP)                | 0,025***                                     | 0,004 | -0,003                                 | 0,004 |
| Proxy answ. NHATS questions (SP)                    | 0,033                                        | 0,034 | 0,012                                  | 0,037 |
| Heart attack (SP)                                   | -0,012                                       | 0,030 | -0,019                                 | 0,035 |
| Heart disease (SP)                                  | -0,033                                       | 0,022 | 0,029                                  | 0,026 |
| High blood pressure (SP)                            | -0,030                                       | 0,025 | 0,000                                  | 0,028 |
| Arthritis (SP)                                      | 0,004                                        | 0,023 | 0,002                                  | 0,027 |
| Osteoporosis (SP)                                   | -0,015                                       | 0,021 | -0,015                                 | 0,024 |
| Diabetes (SP)                                       | 0,020                                        | 0,023 | -0,022                                 | 0,027 |
| Lung disease (SP)                                   | 0,028                                        | 0,025 | -0,085**                               | 0,030 |

|                                           |                       |       |                    |       |
|-------------------------------------------|-----------------------|-------|--------------------|-------|
| Stroke (SP)                               | 0,035                 | 0,029 | -0,045             | 0,034 |
| Dementia (SP)                             | -0,010                | 0,027 | -0,017             | 0,031 |
| Cancer (SP)                               | 0,034                 | 0,025 | 0,019              | 0,032 |
| Lives in an assisted living facility (SP) | -0,141 <sup>***</sup> | 0,021 | 0,083 <sup>*</sup> | 0,033 |
| NSOC Round II                             | -0,011                | 0,023 | -0,005             | 0,027 |
| NSOC Round III                            | 0,017                 | 0,025 | -0,003             | 0,028 |
| Constant                                  | 0,412                 | 0,249 | 0,468              | 0,254 |
| <hr/>                                     |                       |       |                    |       |
| F-Statistic                               | 13.97                 |       | 16.56              |       |
| Number of observations                    | 3,039                 |       | 3,039              |       |

Note: SP represents NHATS survey person and denotes care recipient information. All other variables are on caregiver level. Standard Errors in parentheses. Caregivers are clustered within SPs (Number of strata: 56, number of PSUs: 1.810). We estimate regressions for individuals who provide information on all outcomes to better compare results. F-Statistic is the Sanderson-Windmeijer first-stage F statistic of weak identification of individual endogenous regressor (Sanderson & Windmeijer, 2016). \*  $p < 0.05$ , \*\*  $p < 0.01$ , \*\*\*  $p < 0.001$

Table A8. Main results – 2SLS estimations using NSOC cross-sectional weights

|                                      | (1)    |         | (2)    |         | (3)    |         | (4)     |         | (5)    |         | (6)    |         | (7)          |         |
|--------------------------------------|--------|---------|--------|---------|--------|---------|---------|---------|--------|---------|--------|---------|--------------|---------|
|                                      | PHQ4   |         | GAD2   |         | PHQ2   |         | purpose |         | growth |         | closer |         | satisfaction |         |
| Intensive caregiving                 | 11.348 | (7.814) | 7.514  | (5.206) | 3.834  | (2.999) | 0.239   | (0.394) | 0.882  | (0.886) | -0.997 | (0.764) | -0.146       | (0.195) |
| Work for pay                         | 2.719  | (2.824) | 1.745  | (1.813) | 0.974  | (1.131) | 0.187   | (0.123) | 0.113  | (0.283) | -0.120 | (0.301) | -0.083       | (0.074) |
| Widowed (SP)                         | -0.313 | (0.504) | -0.302 | (0.338) | -0.011 | (0.190) | -0.033  | (0.026) | -0.033 | (0.059) | 0.047  | (0.047) | 0.001        | (0.014) |
| Married                              | 0.618  | (0.983) | 0.701  | (0.665) | -0.083 | (0.371) | 0.052   | (0.053) | 0.186  | (0.118) | -0.154 | (0.095) | -0.020       | (0.023) |
| Black                                | -2.309 | (1.333) | -1.563 | (0.883) | -0.746 | (0.512) | -0.030  | (0.066) | -0.108 | (0.145) | 0.237  | (0.129) | 0.039        | (0.033) |
| Other                                | -0.315 | (0.628) | -0.222 | (0.405) | -0.094 | (0.253) | 0.015   | (0.023) | -0.042 | (0.070) | -0.010 | (0.064) | -0.016       | (0.027) |
| Hispanic                             | -2.350 | (1.486) | -1.488 | (1.005) | -0.862 | (0.555) | -0.063  | (0.077) | -0.189 | (0.168) | 0.224  | (0.146) | 0.042        | (0.036) |
| Age in years                         | 0.072  | (0.117) | 0.019  | (0.080) | 0.053  | (0.042) | -0.004  | (0.006) | -0.012 | (0.012) | 0.002  | (0.013) | -0.001       | (0.002) |
| Age in years squared/100             | -0.027 | (0.140) | 0.008  | (0.094) | -0.035 | (0.052) | 0.007   | (0.006) | 0.012  | (0.014) | -0.005 | (0.016) | -0.000       | (0.003) |
| Male                                 | 0.395  | (0.609) | 0.183  | (0.413) | 0.212  | (0.224) | 0.008   | (0.031) | 0.074  | (0.066) | -0.075 | (0.061) | -0.021       | (0.015) |
| Numb. of self-care or mob. lim. (SP) | -0.220 | (0.193) | -0.164 | (0.129) | -0.056 | (0.074) | -0.007  | (0.010) | -0.026 | (0.022) | 0.023  | (0.019) | 0.004        | (0.004) |
| Proxy answ. NHATS questions (SP)     | -0.545 | (0.519) | -0.306 | (0.340) | -0.239 | (0.201) | -0.021  | (0.027) | 0.015  | (0.053) | 0.100  | (0.059) | 0.019        | (0.014) |
| Heart attack (SP)                    | 0.039  | (0.409) | 0.033  | (0.273) | 0.006  | (0.155) | 0.030*  | (0.014) | 0.009  | (0.039) | 0.050  | (0.040) | 0.004        | (0.008) |
| Heart disease (SP)                   | 0.481  | (0.363) | 0.323  | (0.244) | 0.159  | (0.134) | 0.013   | (0.016) | 0.053  | (0.040) | -0.038 | (0.036) | 0.005        | (0.009) |
| High blood pressure                  | 0.307  | (0.397) | 0.238  | (0.260) | 0.069  | (0.151) | 0.010   | (0.018) | 0.015  | (0.040) | -0.024 | (0.041) | -0.012       | (0.008) |

|                                           |        |         |        |         |        |         |         |         |        |         |         |         |          |         |
|-------------------------------------------|--------|---------|--------|---------|--------|---------|---------|---------|--------|---------|---------|---------|----------|---------|
| (SP)                                      |        |         |        |         |        |         |         |         |        |         |         |         |          |         |
| Arthritis (SP)                            | 0.114  | (0.286) | 0.008  | (0.191) | 0.106  | (0.108) | 0.005   | (0.012) | -0.016 | (0.028) | 0.028   | (0.030) | -0.011   | (0.008) |
| Osteoporosis (SP)                         | 0.061  | (0.287) | 0.124  | (0.190) | -0.063 | (0.111) | -0.000  | (0.011) | 0.022  | (0.031) | -0.012  | (0.030) | 0.004    | (0.009) |
| Diabetes (SP)                             | -0.027 | (0.320) | -0.066 | (0.215) | 0.039  | (0.117) | -0.005  | (0.014) | -0.011 | (0.032) | -0.003  | (0.031) | -0.011   | (0.009) |
| Lung disease (SP)                         | 0.053  | (0.362) | -0.018 | (0.241) | 0.072  | (0.136) | 0.016   | (0.014) | -0.060 | (0.038) | 0.019   | (0.035) | 0.012    | (0.008) |
| Stroke (SP)                               | 0.016  | (0.419) | 0.029  | (0.286) | -0.013 | (0.155) | -0.013  | (0.019) | -0.027 | (0.044) | -0.013  | (0.047) | 0.011    | (0.009) |
| Dementia (SP)                             | 0.322  | (0.380) | 0.201  | (0.244) | 0.121  | (0.149) | 0.015   | (0.018) | -0.012 | (0.039) | -0.086* | (0.043) | -0.006   | (0.011) |
| Cancer (SP)                               | -0.148 | (0.430) | -0.142 | (0.279) | -0.006 | (0.171) | -0.019  | (0.020) | -0.051 | (0.045) | 0.025   | (0.045) | -0.002   | (0.011) |
| Lives in an assisted living facility (SP) | 1.284  | (1.011) | 0.876  | (0.675) | 0.408  | (0.385) | 0.022   | (0.051) | 0.143  | (0.112) | -0.139  | (0.097) | 0.003    | (0.026) |
| NSOC Round II                             | -0.160 | (0.305) | -0.063 | (0.204) | -0.097 | (0.115) | 0.014   | (0.014) | 0.012  | (0.030) | 0.003   | (0.031) | -0.007   | (0.007) |
| NSOC Round III                            | -0.253 | (0.339) | -0.112 | (0.223) | -0.142 | (0.129) | -0.004  | (0.015) | -0.002 | (0.034) | 0.041   | (0.035) | -0.015   | (0.011) |
| Constant                                  | -4.626 | (4.377) | -2.521 | (2.952) | -2.106 | (1.639) | 0.789** | (0.245) | 0.878  | (0.480) | 1.174*  | (0.461) | 1.158*** | (0.104) |
| Outcome is binary                         | no     |         | no     |         | no     |         | yes     |         | yes    |         | yes     |         | yes      |         |
| Number of observations                    | 3,039  |         | 3,039  |         | 3,039  |         | 3,039   |         | 3,039  |         | 3,039   |         | 3,039    |         |

Note: SP represents NHATS survey person and denotes care recipient information. All other variables are on caregiver level. Standard Errors in parentheses. Caregivers are clustered within SPs

(Number of strata: 56, number of PSUs: 1.810). We estimate regressions for individuals who provide information on all outcomes to better compare results. Intensive caregiving denotes helping minimum of 80 hours a month. Work for pay denotes working in the last week or month. \*  $p < 0.05$ , \*\*  $p < 0.01$ , \*\*\*  $p < 0.001$

Table A9. Main results – Unadjusted associations using NSOC cross-sectional weights

|                        | (1)              | (2)              | (3)              | (4)              | (5)              | (6)              | (7)              |
|------------------------|------------------|------------------|------------------|------------------|------------------|------------------|------------------|
|                        | PHQ4             | GAD2             | PHQ2             | purpose          | growth           | closer           | satisfaction     |
| Intensive caregiving   | 2.655*** (0.117) | 1.324*** (0.069) | 1.331*** (0.066) | 0.945*** (0.010) | 0.808*** (0.017) | 0.917*** (0.014) | 0.994*** (0.004) |
| Work for pay           | 1.824*** (0.071) | 1.013*** (0.044) | 0.811*** (0.038) | 0.974*** (0.005) | 0.890*** (0.010) | 0.881*** (0.011) | 0.983*** (0.005) |
| Number of observations | 3,039            | 3,039            | 3,039            | 3,039            | 3,039            | 3,039            | 3,039            |

Standard Errors in parentheses. Unadjusted associations (Separate estimations). We estimate regressions for individuals who provide information on all outcomes to better compare results.

Caregivers are clustered within SPs (Number of strata: 56, number of PSUs: 1.810). Intensive caregiving denotes helping minimum of 80 hours a month. Work for pay denotes working in the last week or month. \* p < 0.05, \*\* p < 0.01, \*\*\* p < 0.001



Table A10. Main results – OLS estimations using NSOC cross-sectional weights

|                                         | (1)                  | (2)                  | (3)                  | (4)                 | (5)                 | (6)                 | (7)                |
|-----------------------------------------|----------------------|----------------------|----------------------|---------------------|---------------------|---------------------|--------------------|
|                                         | PHQ4                 | GAD2                 | PHQ2                 | purpose             | growth              | closer              | satisfaction       |
| Intensive caregiving                    | 0.455**<br>(0.140)   | 0.170*<br>(0.084)    | 0.285***<br>(0.077)  | -0.010<br>(0.010)   | -0.049*<br>(0.020)  | 0.012<br>(0.016)    | 0.007<br>(0.005)   |
| Work for pay                            | -0.676***<br>(0.138) | -0.300***<br>(0.081) | -0.375***<br>(0.071) | 0.018*<br>(0.009)   | 0.053**<br>(0.019)  | -0.034*<br>(0.014)  | -0.001<br>(0.005)  |
| Widowed (SP)                            | 0.163<br>(0.132)     | 0.042<br>(0.080)     | 0.121<br>(0.067)     | -0.031**<br>(0.010) | 0.030<br>(0.019)    | -0.019<br>(0.017)   | -0.002<br>(0.007)  |
| Married                                 | -0.653***<br>(0.128) | -0.178*<br>(0.074)   | -0.476***<br>(0.070) | 0.031**<br>(0.010)  | 0.057**<br>(0.018)  | -0.017<br>(0.016)   | -0.005<br>(0.006)  |
| Black                                   | -0.571***<br>(0.140) | -0.384***<br>(0.081) | -0.187*<br>(0.076)   | 0.007<br>(0.011)    | 0.047*<br>(0.018)   | 0.069***<br>(0.015) | 0.015**<br>(0.006) |
| Other                                   | -0.236<br>(0.329)    | -0.166<br>(0.185)    | -0.071<br>(0.181)    | 0.016<br>(0.017)    | -0.033<br>(0.047)   | -0.020<br>(0.052)   | -0.016<br>(0.026)  |
| Hispanic                                | -0.476*<br>(0.189)   | -0.225<br>(0.127)    | -0.251*<br>(0.108)   | -0.020<br>(0.018)   | -0.029<br>(0.032)   | 0.050*<br>(0.025)   | 0.016*<br>(0.007)  |
| Age in years                            | 0.115*<br>(0.051)    | 0.039<br>(0.035)     | 0.076***<br>(0.023)  | 0.000<br>(0.004)    | -0.016**<br>(0.005) | 0.006<br>(0.006)    | -0.003<br>(0.002)  |
| Age in years squared/100                | -0.135**<br>(0.046)  | -0.054<br>(0.031)    | -0.081***<br>(0.021) | 0.000<br>(0.004)    | 0.013**<br>(0.005)  | -0.005<br>(0.006)   | 0.003<br>(0.002)   |
| Male                                    | -0.306*<br>(0.126)   | -0.300***<br>(0.076) | -0.007<br>(0.065)    | -0.004<br>(0.009)   | 0.005<br>(0.017)    | -0.001<br>(0.016)   | -0.013<br>(0.007)  |
| Numb. of self-care or<br>mob. lim. (SP) | 0.037<br>(0.021)     | 0.010<br>(0.013)     | 0.027*<br>(0.011)    | -0.001<br>(0.002)   | -0.003<br>(0.003)   | -0.002<br>(0.003)   | 0.001<br>(0.001)   |
| Proxy answ. NHATS<br>questions (SP)     | -0.131<br>(0.203)    | -0.031<br>(0.123)    | -0.100<br>(0.113)    | -0.010<br>(0.017)   | 0.047<br>(0.029)    | 0.065*<br>(0.033)   | 0.013<br>(0.010)   |
| Heart attack (SP)                       | -0.158<br>(0.185)    | -0.096<br>(0.116)    | -0.063<br>(0.092)    | 0.024**<br>(0.009)  | -0.003<br>(0.023)   | 0.064**<br>(0.023)  | 0.008<br>(0.006)   |
| Heart disease (SP)                      | 0.214<br>(0.126)     | 0.136<br>(0.080)     | 0.078<br>(0.064)     | 0.010<br>(0.008)    | 0.024<br>(0.018)    | -0.007<br>(0.018)   | 0.008<br>(0.006)   |
| High blood pressure<br>(SP)             | -0.024<br>(0.157)    | 0.015<br>(0.088)     | -0.039<br>(0.083)    | 0.002<br>(0.013)    | -0.013<br>(0.020)   | 0.006<br>(0.022)    | -0.007<br>(0.006)  |

|                                           |         |         |        |         |         |         |          |         |          |         |          |         |          |         |
|-------------------------------------------|---------|---------|--------|---------|---------|---------|----------|---------|----------|---------|----------|---------|----------|---------|
| Arthritis (SP)                            | 0.170   | (0.145) | 0.045  | (0.089) | 0.125   | (0.073) | 0.007    | (0.011) | -0.012   | (0.019) | 0.023    | (0.020) | -0.012   | (0.007) |
| Osteoporosis (SP)                         | -0.147  | (0.122) | -0.012 | (0.074) | -0.135* | (0.065) | -0.007   | (0.010) | 0.009    | (0.018) | 0.003    | (0.016) | 0.007    | (0.008) |
| Diabetes (SP)                             | 0.115   | (0.133) | 0.034  | (0.081) | 0.080   | (0.069) | -0.004   | (0.010) | 0.006    | (0.018) | -0.021   | (0.018) | -0.012   | (0.007) |
| Lung disease (SP)                         | 0.064   | (0.152) | 0.008  | (0.091) | 0.055   | (0.078) | 0.009    | (0.010) | -0.041*  | (0.020) | -0.001   | (0.019) | 0.014*   | (0.006) |
| Stroke (SP)                               | 0.258   | (0.184) | 0.204  | (0.115) | 0.055   | (0.094) | -0.012   | (0.012) | 0.004    | (0.022) | -0.046   | (0.027) | 0.010**  | (0.004) |
| Dementia (SP)                             | 0.154   | (0.167) | 0.092  | (0.101) | 0.062   | (0.089) | 0.009    | (0.013) | -0.022   | (0.026) | -0.075*  | (0.030) | -0.003   | (0.010) |
| Cancer (SP)                               | 0.283   | (0.169) | 0.144  | (0.097) | 0.139   | (0.090) | -0.007   | (0.012) | -0.018   | (0.022) | -0.011   | (0.021) | -0.009   | (0.008) |
| Lives in an assisted living facility (SP) | 0.038   | (0.176) | 0.017  | (0.100) | 0.021   | (0.092) | 0.001    | (0.013) | 0.018    | (0.023) | -0.005   | (0.023) | 0.018**  | (0.006) |
| NSOC Round II                             | -0.284* | (0.141) | -0.145 | (0.088) | -0.139  | (0.073) | 0.011    | (0.011) | 0.003    | (0.019) | 0.013    | (0.019) | -0.005   | (0.006) |
| NSOC Round III                            | -0.068  | (0.150) | 0.014  | (0.092) | -0.081  | (0.077) | 0.000    | (0.012) | 0.014    | (0.020) | 0.024    | (0.020) | -0.017*  | (0.008) |
| Constant                                  | 0.441   | (1.392) | 0.857  | (0.968) | -0.416  | (0.602) | 0.919*** | (0.123) | 1.274*** | (0.138) | 0.741*** | (0.179) | 1.081*** | (0.056) |
| Number of observations                    | 3,039   |         | 3,039  |         | 3,039   |         | 3,039    |         | 3,039    |         | 3,039    |         | 3,039    |         |

Note: SP represents NHATS survey person and denotes care recipient information. All other variables are on caregiver level. Standard Errors in parentheses. Caregivers are clustered within SPs (Number of strata: 56, number of PSUs: 1.810). We estimate regressions for individuals who provide information on all outcomes to better compare results. Intensive caregiving denotes helping minimum of 80 hours a month. Work for pay denotes working in the last week or month. \*  $p < 0.05$ , \*\*  $p < 0.01$ , \*\*\*  $p < 0.001$
